# Supplementary material for: A porous aromatic cage-based electrochemical sensor for enantioselective recognition of DOPA
Source: Royal Society of Chemistry journal article supplement (doi:10.1039/d4cc02622e), 2024-01-01
Supplement: d4cc02622e1.pdf [file d4cc02622e1.pdf]

## Supporting Information

### Porous aromatic cage-based electrochemical sensor for enantioselective recognition of DOPA

*Junning Kou<sup>a1</sup>, Ziyu Zhu<sup>a1</sup>, Jianzhu Jiang<sup>a1</sup>, Li Chen<sup>b</sup>, Kunhao Zhang,<sup>c\*</sup>*

*Guogang Shan<sup>a\*</sup>, Xinlong Wang<sup>a\*</sup>, Zhongmin Su<sup>b</sup>, Chunyi Sun<sup>a\*</sup>*

- a. National & Local United Engineering Laboratory for Power Battery, Department of Chemistry, Northeast Normal University, Changchun, Jilin, 130024, China.*
- b. Department of Chemistry, Faculty of Science, Yanbian University, Yanji, Jilin, 133002, China.*
- c. Shanghai Synchrotron Radiation Facility (SSRF), Shanghai Advanced Research Institute, Chinese Academy of Sciences, Shanghai, 201204, China*

<sup>1</sup> These authors contributed equally.

\* Corresponding author.

E-mail address: suncy009@nenu.edu.cn (C. Sun); wangxl824@nenu.edu.cn (X. Wang); shangg187@nenu.edu.cn (G. Shan); zhangkh@sari.ac.cn (K. Zhang)

## Table of Contents

|                                                                                                                                                           |    |
|-----------------------------------------------------------------------------------------------------------------------------------------------------------|----|
| <b>Experimental Procedures</b> .....                                                                                                                      | 3  |
| <b>Results and Discussion</b> .....                                                                                                                       | 4  |
| <b>Fig. S1.</b> FTIR spectrum of $C_{60}@R$ -PAC-2 after soaking under different conditions. ....                                                         | 4  |
| <b>Fig. S2.</b> Photograph of the prepared crystals of $C_{60}@R$ -PAC-2.....                                                                             | 4  |
| <b>Fig. S3.</b> PXRD patterns of cages. ....                                                                                                              | 5  |
| <b>Fig. S4.</b> PXRD patterns of $C_{60}@R$ -PAC-2 under different harsh conditions. ....                                                                 | 5  |
| <b>Fig. S5.</b> UV-vis diffuse reflectance spectra of $R$ -PAC-2 and $C_{60}@R$ -PAC-2. ....                                                              | 6  |
| <b>Fig. S6.</b> UV absorption spectra of the solution after different solution after immersing $C_{60}@R$ -PAC-2. ....                                    | 6  |
| <b>Fig. S7.</b> DPV of GCE, $C_{60}/GCE$ , PAC-2/GCE and MIX in 0.01 M PBS solution containing 0.1 mM D-Dopa or L-Dopa. ....                              | 7  |
| <b>Fig. S8.</b> Repeated electrochemical recognition of DOPA enantiomers by using $C_{60}@R$ -PAC-2/GCE electrode.....                                    | 7  |
| <b>Fig. S9.</b> The stability of the $C_{60}@R$ -PAC-2/GCE sensor was studied after storing for 1 week.....                                               | 8  |
| <b>Fig. S10.</b> DPV curves of increased concentrations (30 - 1000 $\mu$ M) of enantiomers D-DOPA and L-DOPA at the $C_{60}@R$ -PAC-2/GCE electrode.....  | 8  |
| <b>Fig. S11.</b> DPV curves of increased concentrations (30 - 1000 $\mu$ M) of enantiomers D-DOPA and L-DOPA at the $C_{60}@S$ -PAC-2/GCE electrode. .... | 9  |
| <b>Fig. S12.</b> The detection performance of chiral sensor $C_{60}@R$ -PAC-2 for interfering organic molecules. ....                                     | 9  |
| <b>Supplementary Table 1.</b> Summary of DOPA Chiral Sensors .....                                                                                        | 10 |
| <b>Supplementary References</b> .....                                                                                                                     | 11 |

## Experimental Procedures

### General information

All reagents and solvents were obtained from commercial sources and used without further purification. Fourier transform infrared (FT-IR) spectra (KBr pellets) were recorded in the range 4000–400  $\text{cm}^{-1}$  on Nicolet 6700 using the KBr pellet method. UV-Vis spectra were recorded at a UV-Vis-NIR spectrophotometer (Hitachi U-3900).

### Synthesis of $\text{C}_{60}@R/S\text{-PAC-2}$ .

*R/S*-Br-BINAM (0.066 g, 0.15 mmol), TFP (0.021 g, 0.1 mmol), fullerene  $\text{C}_{60}$  (0.01 mmol), *O*-Xylene (5 mL), *n*-butanol (1 mL) and 6M acetic acid (0.6 mL) were combined in a 20 mL Teflon reactor, sealed, and heated to 120°C for 84 h. After cooling in air to room temperature, the resulting crystals were filtered and repeatedly washed with Ethyl ether.

### Electrochemical experiments

A bare glass carbon electrode (GCE) with a radius of 3 mm was polished continuously on a chamois for 60 s and then rinsed with deionised water. A total of 1 mg of samples, 200  $\mu\text{L}$  ethanol and 100  $\mu\text{L}$  of Nafion solution (5 wt%) were first dispersed in 200  $\mu\text{L}$  of water to produce a suspension. Following a 30-minute sonication-assisted treatment, the homogeneous sample suspensions were loaded onto GCE. The experiments electrochemical tests were conducted on a CHI-760E electrochemical workstation and a Biologic VMP3 electrochemical workstation with a three-electrode configuration. An Ag/AgCl (saturated KCl) electrode and a Pt were used as a reference electrode and counter-electrode respectively; GCE loaded with samples were used as working electrodes.

### Electrochemical Chiral Recognition of Analyte Enantiomers.

Electrochemical chiral recognition of analyte enantiomers was investigated by differential pulse voltammetry (DPV). The as-prepared chiral electrodes were placed into 5 mL test fluid. Then, DPVs were recorded from 0.0 to 0.7 V, with a step potential of 4 mV and an amplitude of 50 mV. Finally, the peak current ratio was calculated to evaluate the recognition efficiency.

## Results and Discussion

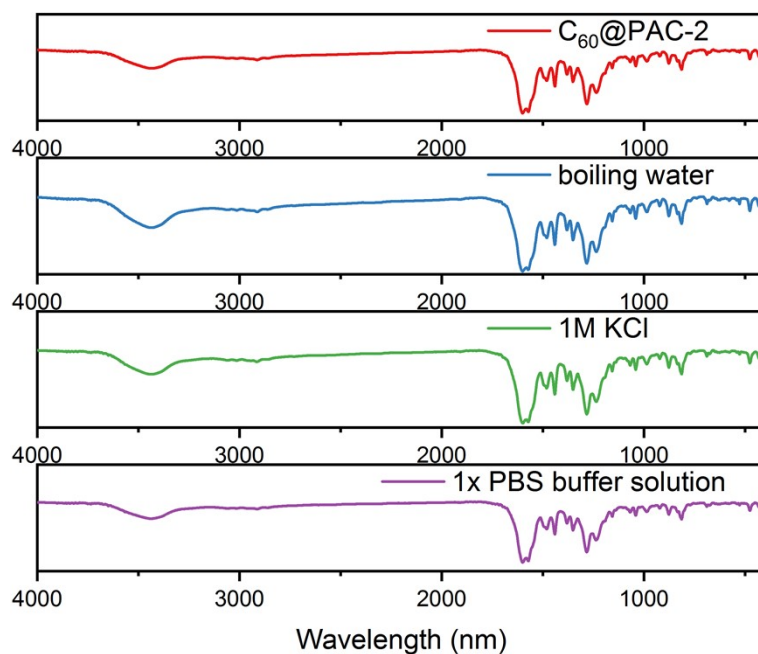

**Fig. S1.** FTIR spectrum (KBr pellets) of  $C_{60}@R-PAC-2$  after soaking under different conditions. FTIR spectrum of the pristine  $C_{60}@R-PAC-2$  (Red), under boiling water (blue), 1M KCl (green) and 1 X PBS buffer solution (purple).

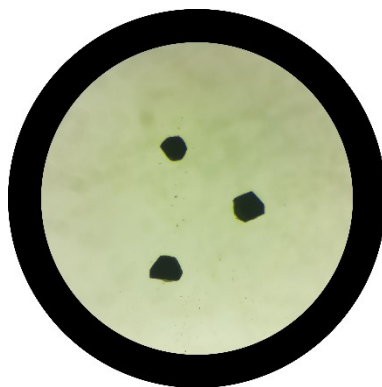

**Fig. S2.** Photograph of the prepared crystals of  $C_{60}@R-PAC-2$ .

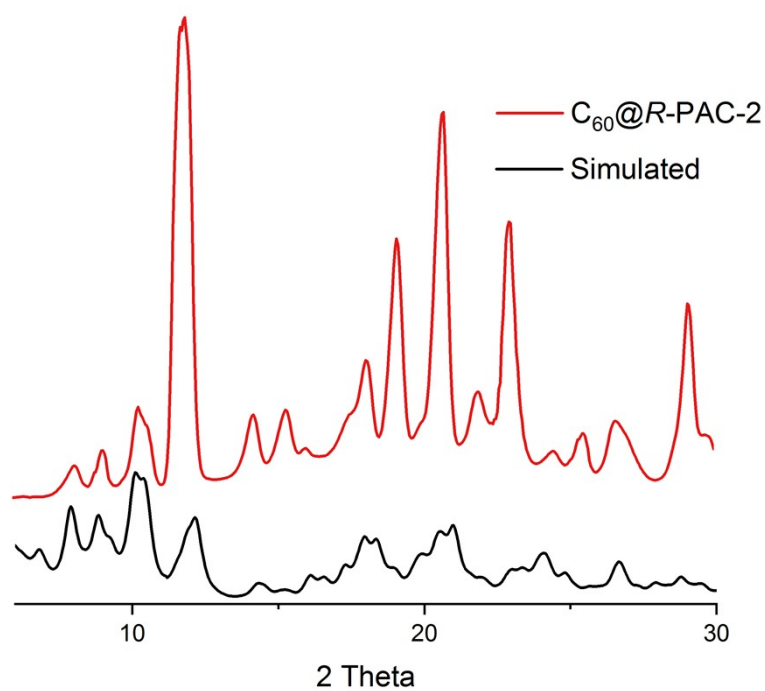

**Fig. S3.** PXRD patterns of cages. The synthesized (red line) and simulated one of  $C_{60}@R-PAC-2$  (black line).

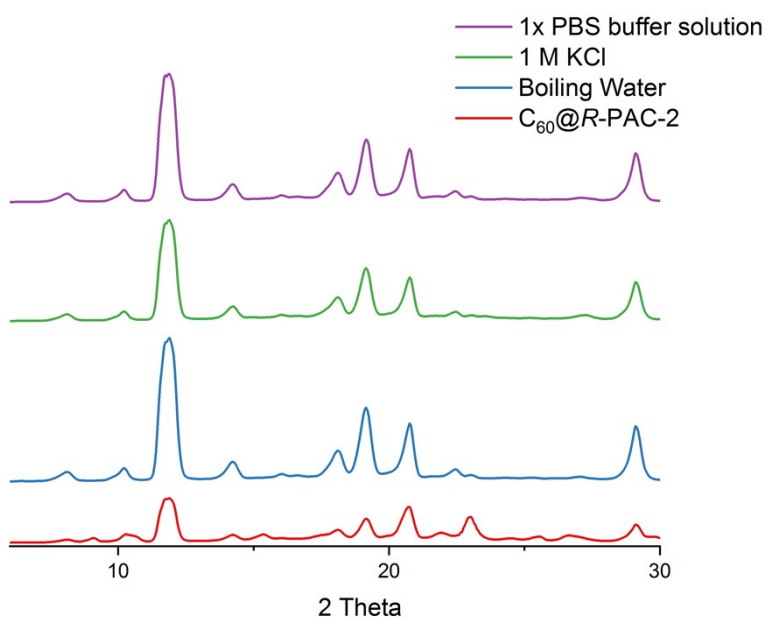

**Fig. S4.** PXRD patterns of  $C_{60}@R-PAC-2$  under different harsh conditions. The the  $C_{60}@R-PAC-2$  (red),  $C_{60}@R-PAC-2$  under boiling water (blue), 1M KCl (green) and 1 X PBS buffer solution (purple).

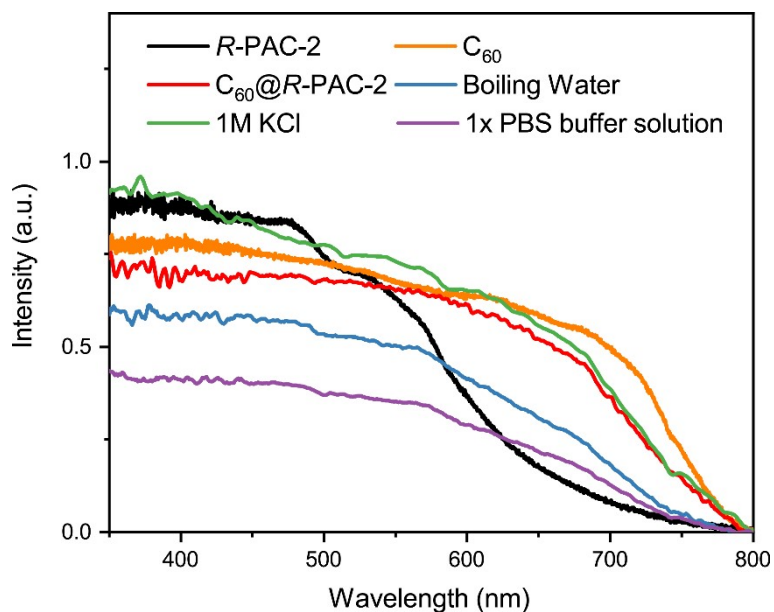

**Fig. S5.** UV-vis diffuse reflectance spectra of *R*-PAC-2 (black) and C<sub>60</sub>@*R*-PAC-2 (red). UV-vis diffuse reflectance spectra of the pristine C<sub>60</sub>@*R*-PAC-2 under boiling water (blue), 1M KCl (green) and 1 X PBS buffer solution (purple).

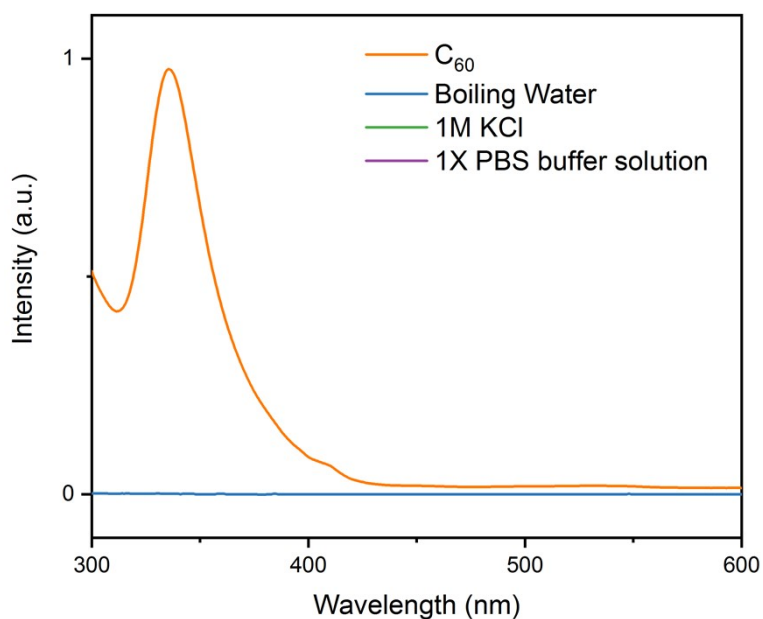

**Fig. S6.** UV absorption spectra of C<sub>60</sub> in toluene (orange). UV absorption spectra of different solution after immersing C<sub>60</sub>@*R*-PAC-2.

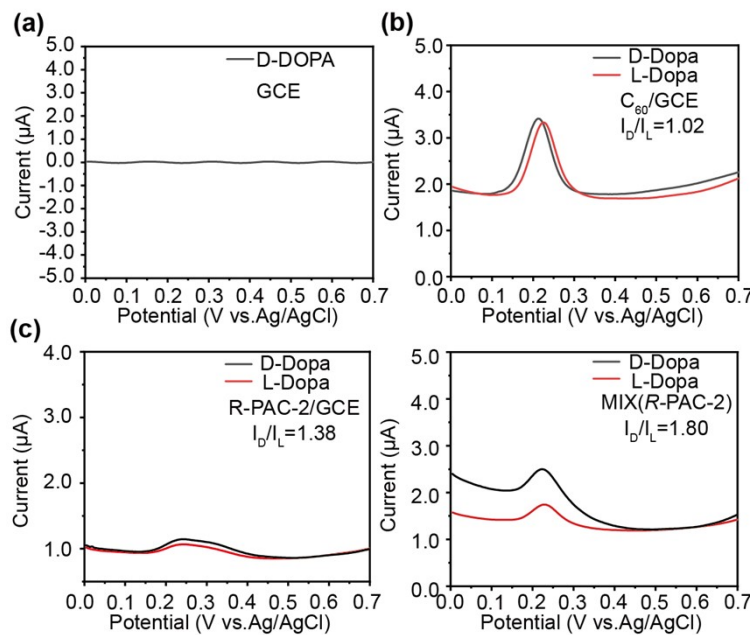

**Fig. S7.** DPV of (a) GCE, (b)  $\text{C}_{60}/\text{GCE}$ , (c) PAC-2/GCE and (d) MIX in 0.01 M PBS solution containing 0.1 mM D-Dopa or L-Dopa.

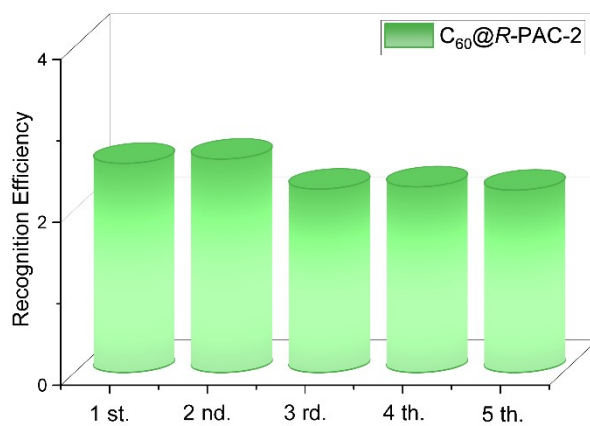

**Fig. S8.** Repeated electrochemical recognition of DOPA enantiomers by using  $\text{C}_{60}@R\text{-PAC-2}/\text{GCE}$  electrode.

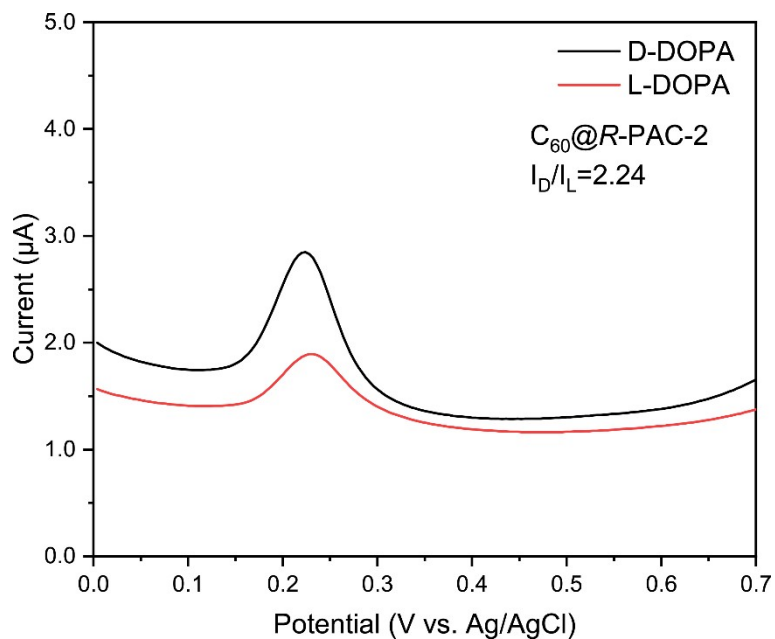

**Fig. S9.** The stability of the  $C_{60}@R-PAC-2/GCE$  sensor was studied after storing for 1 week.

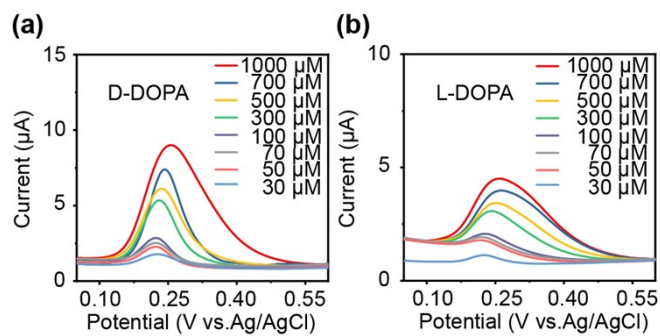

**Fig. S10.** DPV curves of increased concentrations (30 - 1000  $\mu M$ ) of enantiomers D-DOPA(a) and L-DOPA(b) at the  $C_{60}@R-PAC-2/GCE$  electrode.



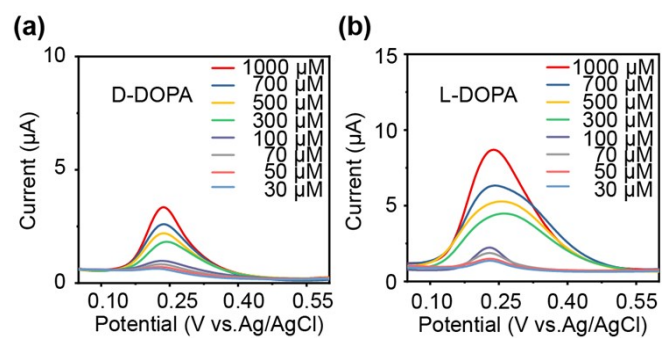

**Fig. S11.** DPV curves of increased concentrations (30 - 1000  $\mu\text{M}$ ) of enantiomers D-DOPA(a) and L-DOPA(b) at the  $\text{C}_{60}@S\text{-PAC-2}/\text{GCE}$  electrode.

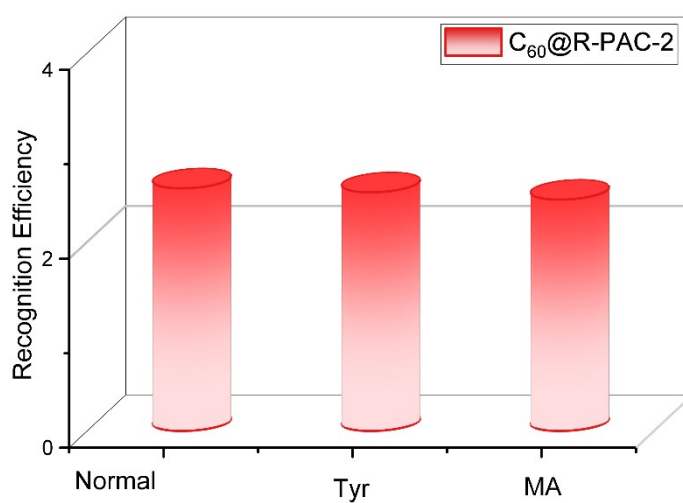

**Fig. S12.** The detection performance of chiral sensor  $\text{C}_{60}@R\text{-PAC-2}$  for interfering organic molecules.

**Supplementary Table 1.** Summary of DOPA Chiral Sensors

| Modifier                         | Method       | Recognition difference | LOD             | Ref.      |
|----------------------------------|--------------|------------------------|-----------------|-----------|
| AuND/GCE                         | DPV          | 2.33                   | 2.5 $\mu$ M     | 1         |
| SWCNTs-EDA                       | CV           | 2.55                   | -               | 2         |
| M-(6,5)-SWCNT                    | DPV          | 2.05                   | -               | 3         |
| P-(6,5)-SWCNT                    | DPV          | 1.90                   | -               | 3         |
| $\beta$ -CD/MWCNTs-IL            | DPV          | 1.51                   | 1.2 nM          | 4         |
| Poly-lysine                      | CV/DPV       | 1.56                   | 0.17 $\mu$ M    | 5         |
| L-tryptophan / Graphene / Pt NPs | DPV          | 1.60                   | 1.7 $10^{-8}$ M | 6         |
| cSWCNTs                          | SWV          | 1.4                    | -               | 7         |
| GNPs/cSWCNTs                     | SWV          | 2.1                    | -               | 8         |
| PLL/GCE                          | DPV          | 1.60                   | 0.33 $\mu$ M    | 5         |
| P-SWCNTs/CFE                     | DPV          | 1.4                    | -               | 9         |
| CdSe/ZnS QDs-PADP                | Fluorescence | 2.49                   | -               | 10        |
| C <sub>60</sub> @R-PAC-2         | DPV          | 2.6                    | 0.2 $\mu$ M     | This work |

### Supplementary References

1. H. Lian, S. Huang, X. Wei, J. Guo, X. Sun and B. Liu, *Talanta*, 2020, **210**, 120654.
2. H. Zhu, F. Chang and Z. Zhu, *Talanta*, 2017, **166**, 70-74.
3. C. Pu, Y. Xu, Q. Liu, A. Zhu and G. Shi, *Anal. Chem.*, 2019, **91**, 3015-3020.
4. Y. Chen, Y. Huang, D. Guo, C. Chen, Q. Wang and Y. Fu, *J. Solid State Electrochem.*, 2014, **18**, 3463-3469.
5. Y. Huang, Q. Han, Q. Zhang, L. Guo, D. Guo and Y. Fu, *Electrochim. Acta*, 2013, **113**, 564-569.
6. Y. Chen, J. Xu, C. Chen, D. Guo and Y. Fu, *New J. Chem.*, 2015, **39**, 6919-6924.
7. L. Chen, F. Chang, L. Meng, M. Li and Z. Zhu, *Analyst*, 2014, **139**, 2243-2248.
8. L. Chen, S. Liu, F. Chang, X. Xie and Z. Zhu, *Electroanalysis*, 2017, **29**, 955-959.
9. W. Kuang, H. Luo and Z. Zhu, *Electrochim. Acta*, 2024, **487**, 144162.
10. Z. Li and M. Zhu, *Chem. Commun.*, 2020, **56**, 14541-14552.
